# Supplementary material for: Cross-disorder genetic analysis of immune diseases reveals distinct gene associations that converge on common pathways
Source: PubMed Central journal article supplement (PMC10182075; doi:10.1038/s41467-023-38389-6), 2023-05-12
Supplement: 41467_2023_38389_MOESM1_ESM.pdf [file 41467_2023_38389_MOESM1_ESM.pdf]

Cross-disorder genetic analysis of immune diseases reveals distinct gene associations that converge on common pathways

## Supplementary Figures

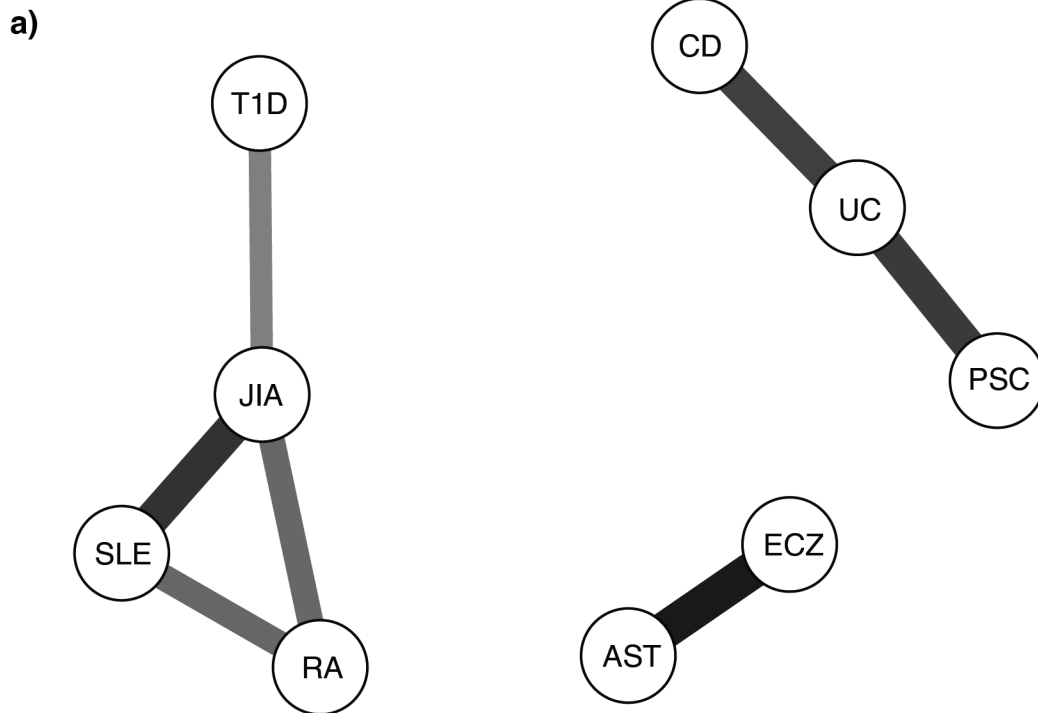

**Supplementary Figure 1. The network plot of LDSC genetic correlations among nine autoimmune diseases. a)** The grey scale and edge width represent the genetic correlation. Genetic correlations  $\geq 0.4$  are shown.

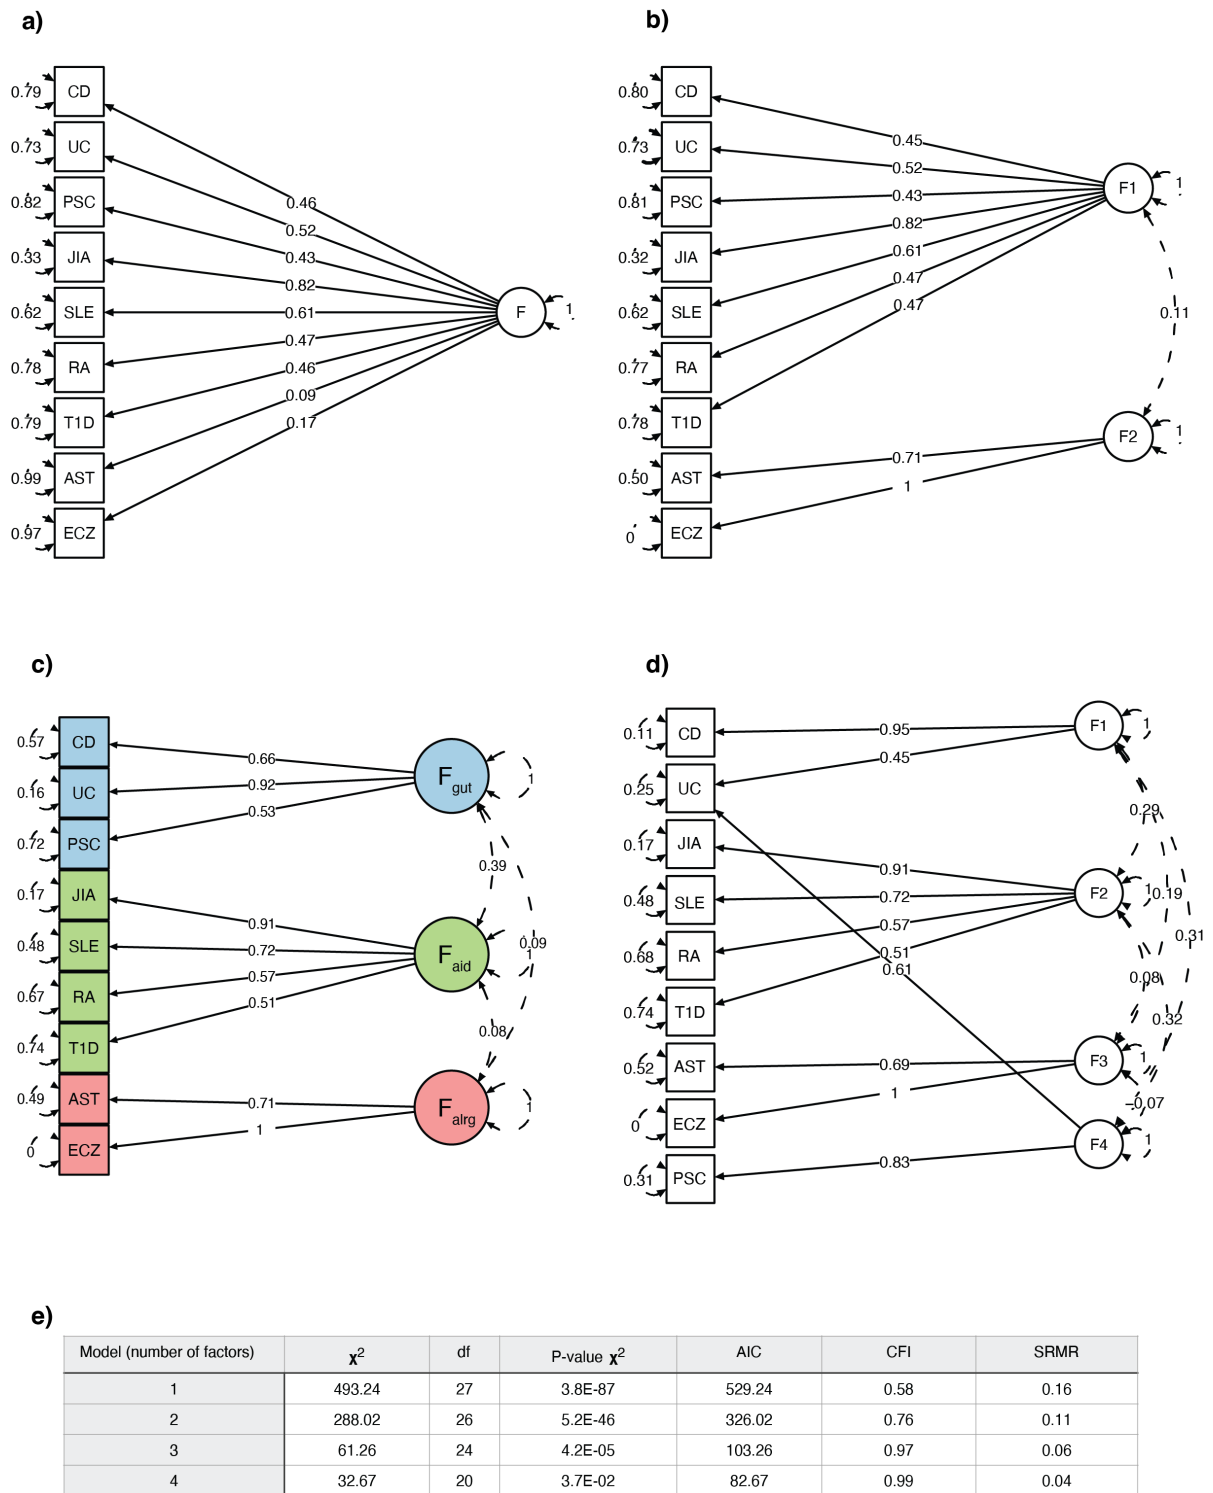

**Supplementary Figure 2. Genomic SEM model statistics. a-d)** We tested four genomic SEM models. Standardised loadings (one-headed arrows), residual variances (two-headed arrows connecting the variable with itself) and covariances (two-headed arrows connecting latent variables) are shown. **e)** Table of factor analysis fit statistics for each of the four models. df, degrees of freedom of the model. P-values were calculated from a  $\chi^2$  distribution with the reported degrees of freedom (df); AIC, Akaike Information Criterion; CFI, Comparative Fit Index; SRM, Standardised Root Mean Square Residual.

a)

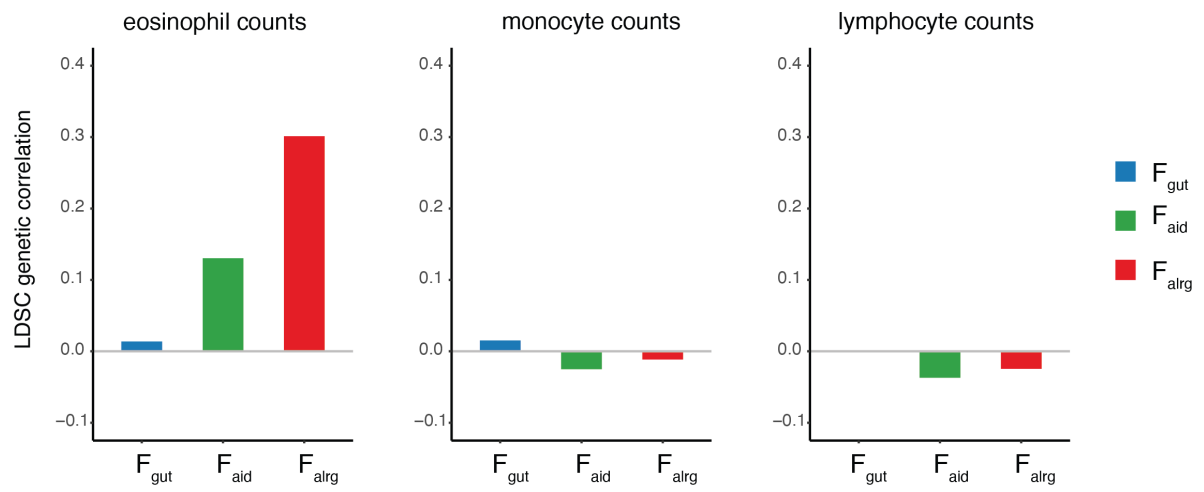

**Supplementary Figure 3. Eosinophil counts are correlated with  $F_{\text{alrg}}$ .** a) LDSC genetic correlations between factors and blood cell counts. Blue, green and red represent  $F_{\text{gut}}$ ,  $F_{\text{aid}}$  and  $F_{\text{alrg}}$  respectively.

a)

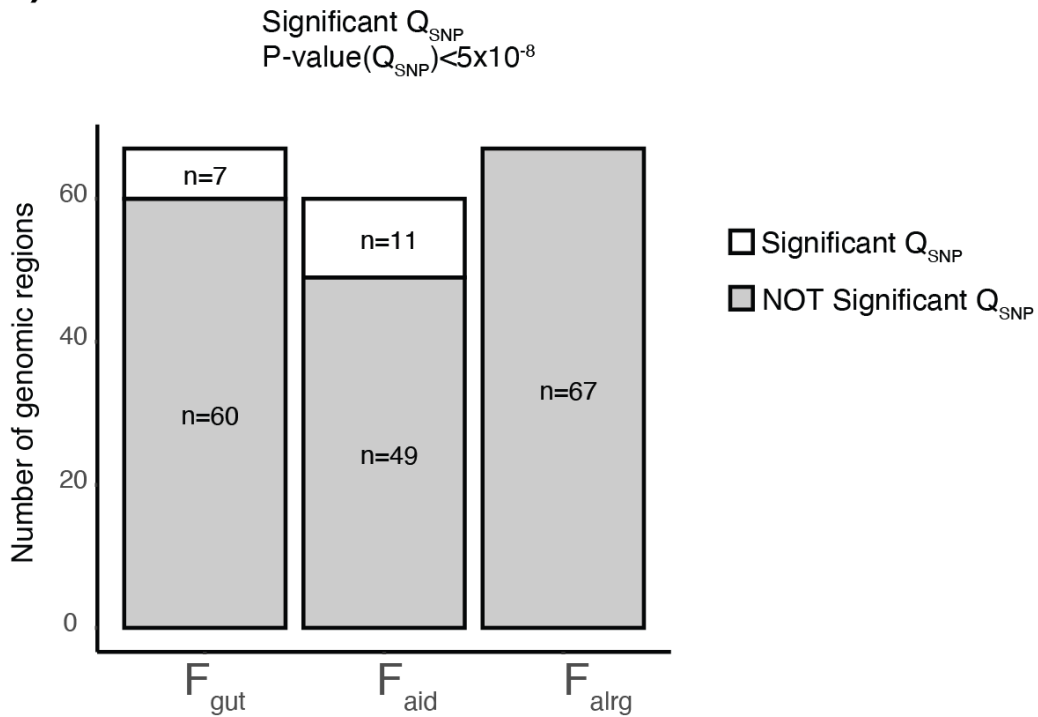

**Supplementary Figure 4.  $Q_{\text{SNP}}$  statistics of factor associated loci. a)** The bar plot shows the number of lead SNPs which had a significant  $Q_{\text{SNP}}$  (in white) and not significant (in grey). Genomic SEM (WLS estimation method) was used to conduct the main GWAS and to estimate the independent model for  $Q_{\text{SNP}}$  calculation. P-values of  $Q_{\text{SNP}}$  were calculated from a  $\chi^2$  distribution with 2, 3 and 1 degrees of freedom for  $F_{\text{gut}}$ ,  $F_{\text{aid}}$  and  $F_{\text{alrg}}$  respectively.

a)

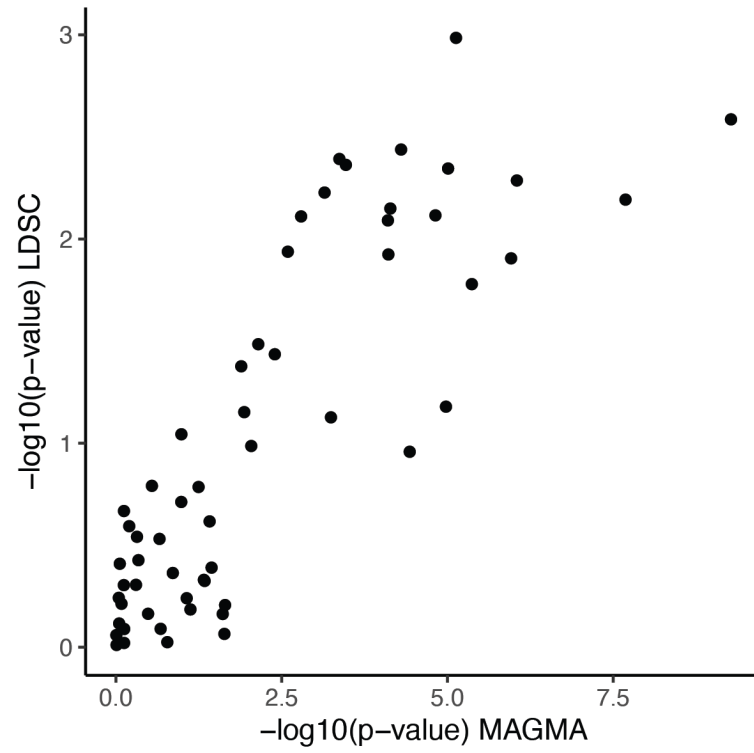

**Supplementary Figure 5. Comparison of LDSC and MAGMA enrichments.** a) Dot plot shows correlation of  $-\log_{10}(\text{p-value})$  between MAGMA and LDSC outputs for OneK1K cohort. P-values were estimated with MAGMA and LDSC (one-sided test).

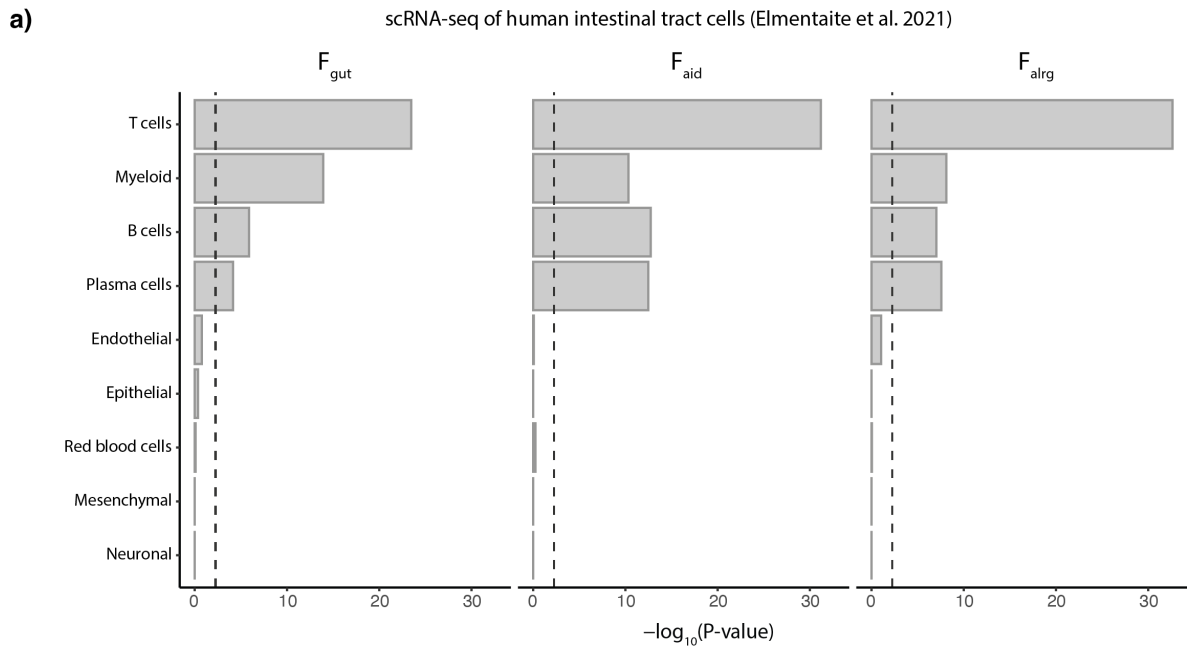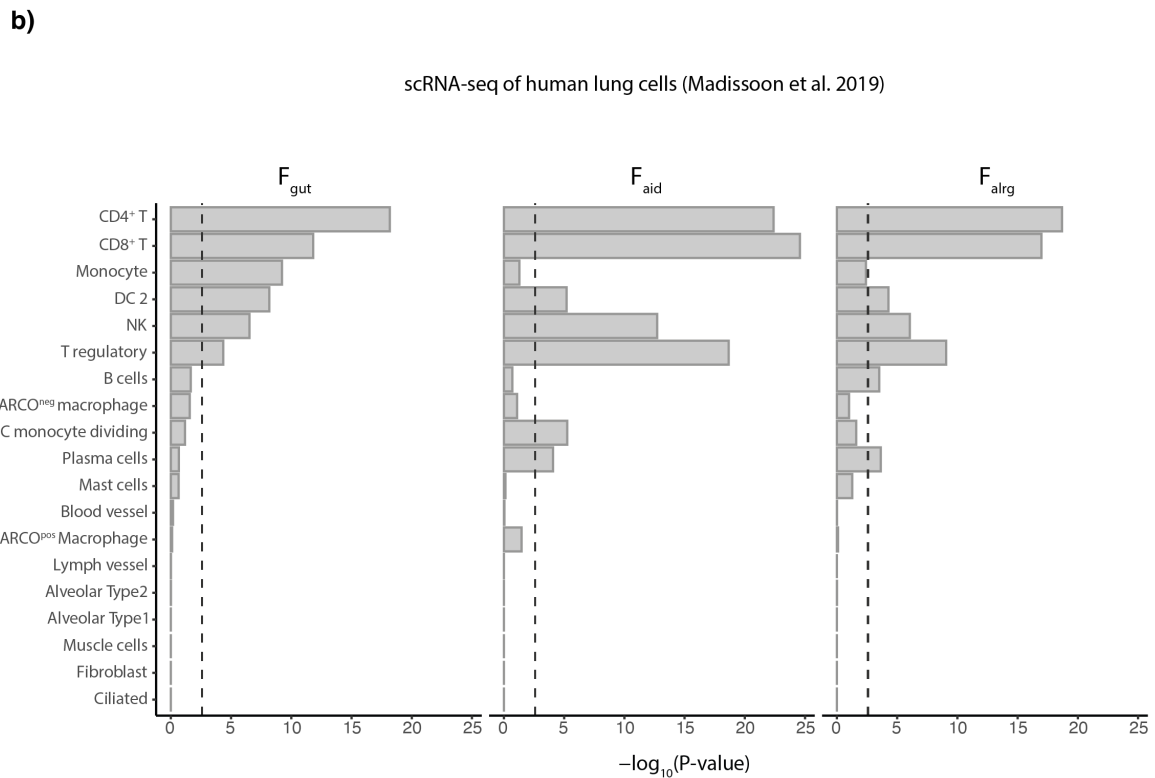

**Supplementary Figure 6. Factor-associated loci are specifically enriched in tissue immune cells. a-b) MAGMA gene-property results of intestinal cells(a) and lung cells(b). The barplot shows  $-\log_{10}(p\text{-value})$  of the enrichment. P-values were estimated with MAGMA for testing the null-hypothesis (one-sided test) that the risk variants were not enriched in the cell-types.**

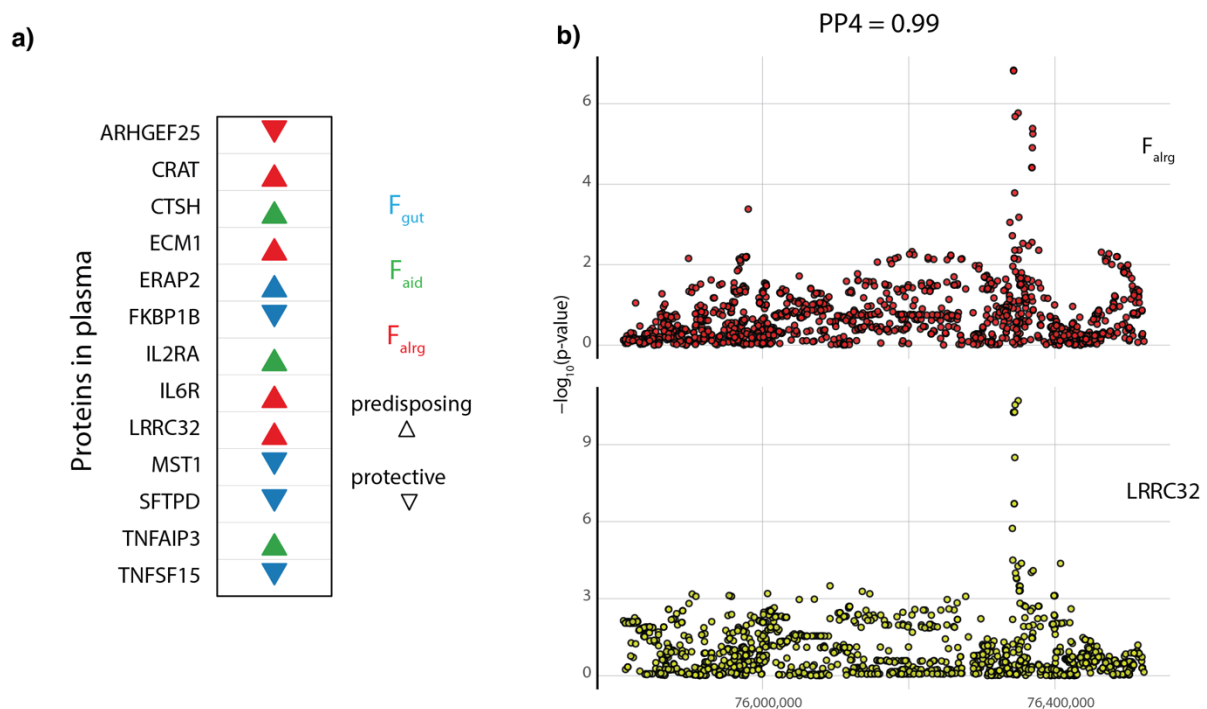

**c)**

| Protein      | Drug                  | Type          | Clinical indication                                                | Application in immune-mediated disease | pQTL effect  |
|--------------|-----------------------|---------------|--------------------------------------------------------------------|----------------------------------------|--------------|
| <i>ERAP2</i> | tosedostat            | inhibitor     | cancer                                                             | -                                      | predisposing |
|              | anti-TAC 90 Y-HAT     | binding agent | cancer                                                             | -                                      | predisposing |
|              | aldesleukin           | agonist       | T1D, CD, cancer, liver disease, tuberculosis, AIDS, COVID-19       | phase I - II                           | predisposing |
|              | basiliximab           | inhibitor     | immune system disease, T1D, UC, kidney disease, cancer             | phase I - III                          | predisposing |
| <i>IL2RA</i> | dacilizumab           | inhibitor     | immune system disease, T1D, MS, UC, asthma, psoriasis, HIV, cancer | phase II - III                         | predisposing |
|              | denileukin difitox    | binding agent | cancer                                                             | -                                      | predisposing |
|              | Lmb-2                 | binding agent | cancer                                                             | -                                      | predisposing |
|              | camidanlumab tesirine | binding agent | cancer                                                             | -                                      | predisposing |
|              | inolimomab            | antagonist    | graft versus host disease                                          | -                                      | predisposing |
|              | levilimab             | inhibitor     | RA, COVID-19                                                       | phase II - III                         | predisposing |
|              | sarilumab             | antagonist    | RA, JIA, COVID-19                                                  | phase I - IV                           | predisposing |
| <i>IL6R</i>  | satralizumab          | antagonist    | immune system disease                                              | phase IV                               | predisposing |
|              | tocilizumab           | inhibitor     | RA, JIA, T1D, SLE COVID-19, cancer,                                | phase I - IV                           | predisposing |
|              | vobarilizumab         | inhibitor     | RA, SLE                                                            | phase I - II                           | predisposing |

**Supplementary Figure 7. Colocalization of protein QTLs.** **a)** Triangles pointing upwards indicate that an increase in protein level increases disease risk, while triangles point downwards indicate decrease of disease risk. Blue, green and red represent  $F_{\text{gut}}$ ,  $F_{\text{aid}}$  and  $F_{\text{alrg}}$  respectively. Mendelian Randomization with Wald ratio method was used to estimate the p-value (two-sided). Only significant MR results (p-value < 0.05) are shown. **b)** LocusZoom plot representing the colocalization between the level of LRRC2 protein in plasma and  $F_{\text{alrg}}$ . P-values refer to the SNP p-values derived from the  $F_{\text{alrg}}$  GWAS and from the p-QTL dataset. **c)** Table representing pQTLs which are known drug targets. MS, multiple sclerosis; UC, ulcerative colitis; CD, Crohn's disease; RA, rheumatoid arthritis; JIA, juvenile idiopathic arthritis; T1D, type 1 diabetes; SLE, systemic lupus erythematosus.
