# Supplementary material for: Cross-disorder genetic analysis of immune diseases reveals distinct gene associations that converge on common pathways
Source: PubMed Central journal article supplement (PMC10182075; doi:10.1038/s41467-023-38389-6), 2023-05-12
Supplement: 41467_2023_38389_MOESM2_ESM.pdf [file 41467_2023_38389_MOESM2_ESM.pdf]

## Description of Additional Supplementary Files

File Name: Supplementary Data 1

Description: **GWAS studies used in the analysis.**

File Name: Supplementary Data 2

Description: **LD score regression results.** Genetic correlation p-values (two-sided) from LD score regression genetic correlation analysis. Standard errors of LD score regression genetic correlations. LDscore regression covariance matrix (on the liability scale).

File Name: Supplementary Data 3

Description: **Significant genomic regions in latent factors and traits GWAS.** Genomic SEM (WLS estimation method) was used to conduct the GWAS.

File Name: Supplementary Data 4

Description: **Conditionally independent loci.**

File Name: Supplementary Data 5

Description: **Colocalization of loci among factors and immune diseases GWAS.**

File Name: Supplementary Data 6

Description: **Significant KEGG pathways enriched in latent factors.** P-values were calculated with the hypergeometric test and corrected for multiple testing with the gprofiler-g:SCS method.

File Name: Supplementary Data 7

Description: **Significant GO terms enriched in latent factors.** P-values were calculated with the hypergeometric test and corrected for multiple testing with the gprofiler-g:SCS method.

File Name: Supplementary Data 8

Description: **Colocalization results between immune latent factors and eQTLs.**

File Name: Supplementary Data 9

Description: **Mendelian Randomization Results of colocalizing eQTL.** Mendelian Randomization with the Wald ratio method was used to estimate the p-values (two-sided).

File Name: Supplementary Data 10

Description: **Colocalisation results between immune latent factors and pQTL.**

File Name: Supplementary Data 11

Description: **Mendelian Randomization results of colocalizing pQTL.** Mendelian Randomization with Wald ratio method was used to estimate the p-values (two-sided).
